Title: ANESTHETIC POTENCY OF CO-ADMINISTERED HALOTHANE AND ISOFLURANE IN THE RAT

Authors: T.M. Skeehan, M.D., D.R. Larach, M.D., Ph.D., F.A. Hensley, Jr., M.D., H.G. Schuler, B.A., J.A. Derr, Ph.D.

Affiliation: Department of Anesthesia, College of Medicine, The Pennsylvania State University, Box 850, Hershey, Pennsylvania 17033

**INTRODUCTION.** Clinically useful anesthetic agents are often combined because of advantageous synergistic or sub-additive interactions. Since this has not been examined for halogenated anesthetic mixtures, an initial step in studying the pharmacology of halothane (H) and isoflurane (I) combinations was undertaken. We describe methods: (1) for administering, and (2) for determining MAC, of proportions of these anesthetics.

**METHODS.** Sprague-Dawley rats weighing  $482 \pm 15$  g (mean  $\pm$  SEM, range 433-540 g, n=9) underwent two studies each. In the *first study*, *odd-number rats* were first given 3% halothane in an induction chamber, then intubated with a 14 g IV catheter (Jelco) using a modified Miller O blade. Mechanical ventilation was instituted (tidal vol 3-5 cc, rate 40-60/min) to keep end-tidal carbon dioxide between 4.0 and 5.0 %. Rectal temperature was servo-controlled to 36-37 °C. Inspired concentration of halothane ( $F_{IH}$ ) was adjusted to  $\approx 1.3\%$  in  $O_2$  (Perkin-Elmer MGA 1100), and 30 min permitted for equilibration. Following a measurement of end-tidal halothane ( $ET_H$ ), a stimulus was applied using an 8" tubing clamp at the base of the tail. Movement of the head or hind limb within 60 sec was considered positive.  $F_{IH}$  was adjusted up or down appropriately by 0.2% (absolute) and tail clamp repeated after 15 min until the highest  $ET_H$  allowing movement and the lowest  $ET_H$  preventing movement were determined.  $MAC_H$  was considered to be the mean of these values. The  $F_{IH}$  was then decreased to an arbitrary fraction of  $MAC_{H,I}$  and isoflurane was added via a separate parallel vaporizer and flow meter at a constant  $F_{II}$  within the range 0.2-1.5%. After 30 min equilibration, tail clamping was carried out in similar fashion, adjusting only the  $F_{IH}$  in 0.2% absolute increments, until a single combination  $MAC_{H,I}$  value was determined. At the conclusion of the first study, the rats were allowed to breathe 100%  $O_2$ , extubated and allowed to recover. Similarly, in the *second study* (48-72 hrs later), *odd-number rats* were given isoflurane for induction, and the  $MAC_I$  was determined. Halothane was added at a constant  $F_{IH}$ , and  $MAC_{I,H}$  measured. Each study lasted  $\approx 3-4$  hr. *Even-numbered rats* also underwent a 2-study protocol analogous to that described above, except isoflurane was given before halothane for study 1, and *vice versa* for study 2. Thus, each rat generated four MAC values ( $MAC_H$ ,  $MAC_{H,I}$ ,  $MAC_I$ ,  $MAC_{I,H}$ ).

The group MAC values for halothane and isoflurane alone were the means of the individual MAC values (n=9). With halothane on the abscissa and isoflurane on the ordinate, a line connecting the mean  $MAC_H$  and  $MAC_I$  values creates a line of additivity. The equation of this line is  $ET_H/MAC_H + ET_I/MAC_I = 1$ . Using a new statistical method that accounts for experimental error in  $MAC_{H,I}$  and  $MAC_{I,H}$  measurements, a series of 95% confidence intervals were developed as intervals on rays which connect the origin and the additivity line. The halothane/isoflurane combination points would be expected to lie within this confidence interval if these two agents are additive in anesthetic potency. A predominance of points to the left of the additivity line would suggest a synergistic, and to the right, a sub-additive effect.

**RESULTS.** (Figure) MAC for halothane was  $1.11 \pm 0.12\%$ , and for isoflurane,  $1.64 \pm 0.08\%$ . These values agree with those published previously<sup>1</sup>. For combination data, several points lie outside of the 95% confidence range; however, the absolute distance in units from the line is small ( $\leq 0.06\%$ ). Since the method necessitated changes in anesthetic concentrations in increments of 0.2%, an error of up to 0.1% is introduced in MAC determinations, easily accounting for the observed deviation. Also, 2/17 points fall

in the supra-additive, and 3/17 in the sub-additive ranges. Assuming a 50% chance of falling on either side of the additivity line, applying a binomial expression yields a high probability that this type of scatter could happen by chance alone (p=.62).

**DISCUSSION.** Our data strongly support the hypothesis that halothane and isoflurane potencies are additive in the brain to cause anesthesia. Anesthetic combinations have been investigated in the past<sup>2,3,4</sup>, but no combination of contemporary clinically used halogenated anesthetics has been studied. The results reported here are not unexpected; in fact, any result but simple additivity would challenge several accepted theories of anesthetic mechanism of action. Our methods and analysis allow a new approach to determining the dose-response relationships of two agents that is superior to the isobolographic analysis used by others<sup>5</sup>, since we consider the 95% fiducial limits of *both* doses in computing the confidence interval. Further studies are now underway with H/I combinations to investigate *hemodynamic effects* of anesthetic proportions expressed as MAC fractions. Perhaps a sub-additive effect on depression of myocardial contractility, heart rate, or systemic vascular tone will exist for a particular  $MAC_{H,I}$  proportion, making combinations of these agents clinically useful.

**REFERENCES.**

1. Quasha AL, Eger EI II, Tinker JH: Determination and applications of MAC. *Anesthesiology* 53:315-334, 1980
2. Miller RD, Wahrenbrock EA, Schroeder CF, Knipstein TW, Eger EI II, Buechel DR: Ethylene-halothane anesthesia: Addition or synergism? *Anesthesiology* 31:301-304, 1969
3. DiFazio CA, Brown RE, Ball CG, Heckel CG, Kennedy SS: Additive effects of anesthetics and theories of anesthesia. *Anesthesiology* 36:57-63, 1972
4. Cullen SC, Eger EI II, Cullen BF, Gregory P: Observations on the anesthetic effect of the combination of xenon and halothane. *Anesthesiology* 31:305-309, 1969
5. Kissin I, McGee T: Hypnotic effect of thiopental-lidocaine combination in the rat. *Anesthesiology* 57:311-313, 1982

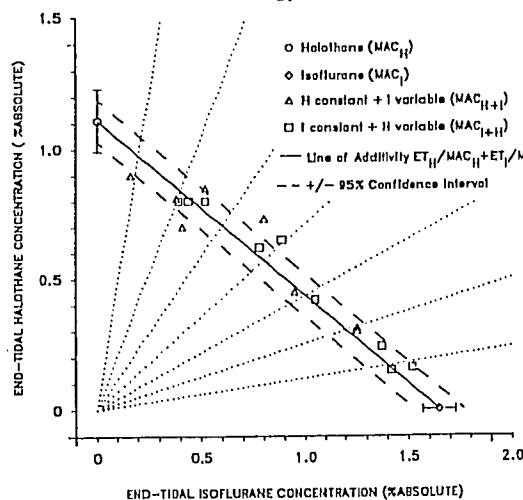

Figure.  $ET_H$  vs  $ET_I$  (n=9). Line of additivity (solid) joins means of  $MAC_H$  and  $MAC_I$ . 95% fiducial limits (dashed lines) are derived from rays (dotted) connecting the additivity line and the origin.
